# Supplementary material
Source: Elsevier journal article supplement (https://www.sciencedirect.com/science/article/pii/S0212656721001918)
Supplement: mmc1 [file S0212656721001918:mmc1.doc]

**S1. Supplementary tables**

Table 1. International Classification of Diseases, Nineth Revision (ICD-9) codes for endpoints of study and procedures.

| ICD-9 code | Description |
| --- | --- |
| 411* | Unstable angina and other forms of acute coronary heart disease |
| 410* | Acute myocardial infarction |
| 433*, 434*, 435*, 436*, 437* | Ischaemic stroke |
| 00.66, 36.03, 36.09, 39.50 | Coronary angioplasty |

Table 2. ICD-10 codes for comorbidities of interest or diseases for exclusion

| ICD-10 code | Description |
| --- | --- |
| I24*, I25* | Coronary heart disease |
| I63*, I65*, I66*, I67.2, I67.8 | Ischaemic stroke |
| G45 | Transient cerebral ischaemic attack |
| I70*, I73*, I74* | Peripheral vascular disease |
| E78* | Dyslipidaemia |
| I10*, I15* | Hypertension |
| E10*, E11* | Diabetes mellitus |
| I48 | Atrial fibrillation |
| I50* | Heart failure |
| C00*-C97* | Malignancies |
| J40*-J44* | Chronic obstructive pulmonary disease |
| F30*-F39* | Depression |
| M05*, M06*, M15*-M19* | Arthritis (osteoarthritis or rheumatoid arthritis) |
| M80*, M81* | Osteoporosis |
| N18* | Chronic kidney disease |
| B20*-B24* | HIV |
| G30*, G31* | Alzheimer’s disease, other dementias |

Table 3. Anatomical, therapeutic, chemical classification system (ATC) codes for drugs of interest.

| ATC code | | Description of therapeutic group |
| --- | --- | --- |
| Study drugs | |  |
|  | B01AC | Platelet-aggregation inhibitors |
|  | C07 | Beta-blockers |
|  | C09A, C09B | Angiotensin-converting enzyme inhibitors |
|  | C09C, C09D | Angiotensin-receptor blockers |
|  | C10AA, C10B | Statins |
| **Concomitant drugs** | |  |
|  | C03 | Diuretics |
|  | C02 | Antihypertensive drugs |
|  | C08CA, C08D | Calcium-channel blockers (dihydropyridines/verapamil, diltiazem) |
|  | B01AA, B01AB, B01AD, B01AE, B01AF, B01AX | Anticoagulants |
|  | A10 | Drugs used in diabetes mellitus |
|  | C10AB, C10AC, C10AD, C10AX | Other lipid-lowering drugs |
|  | C01A, C01B | Digoxin and antiarrhythmic drugs |
|  | C01DA | Nitrates |
|  | N05A | Antipsychotics |
|  | M01A, N02BA, N02BB | Non-steroidal anti-inflammatory drugs |
